# Supplementary material for: Identification, Characterization, and Virulence Gene Expression of Marine Enterobacteria in the Upper Gulf of Thailand
Source: MDPI journal article supplement (doi:10.3390/microorganisms10030511), 2022-02-26
Supplement: s1 [file s1]

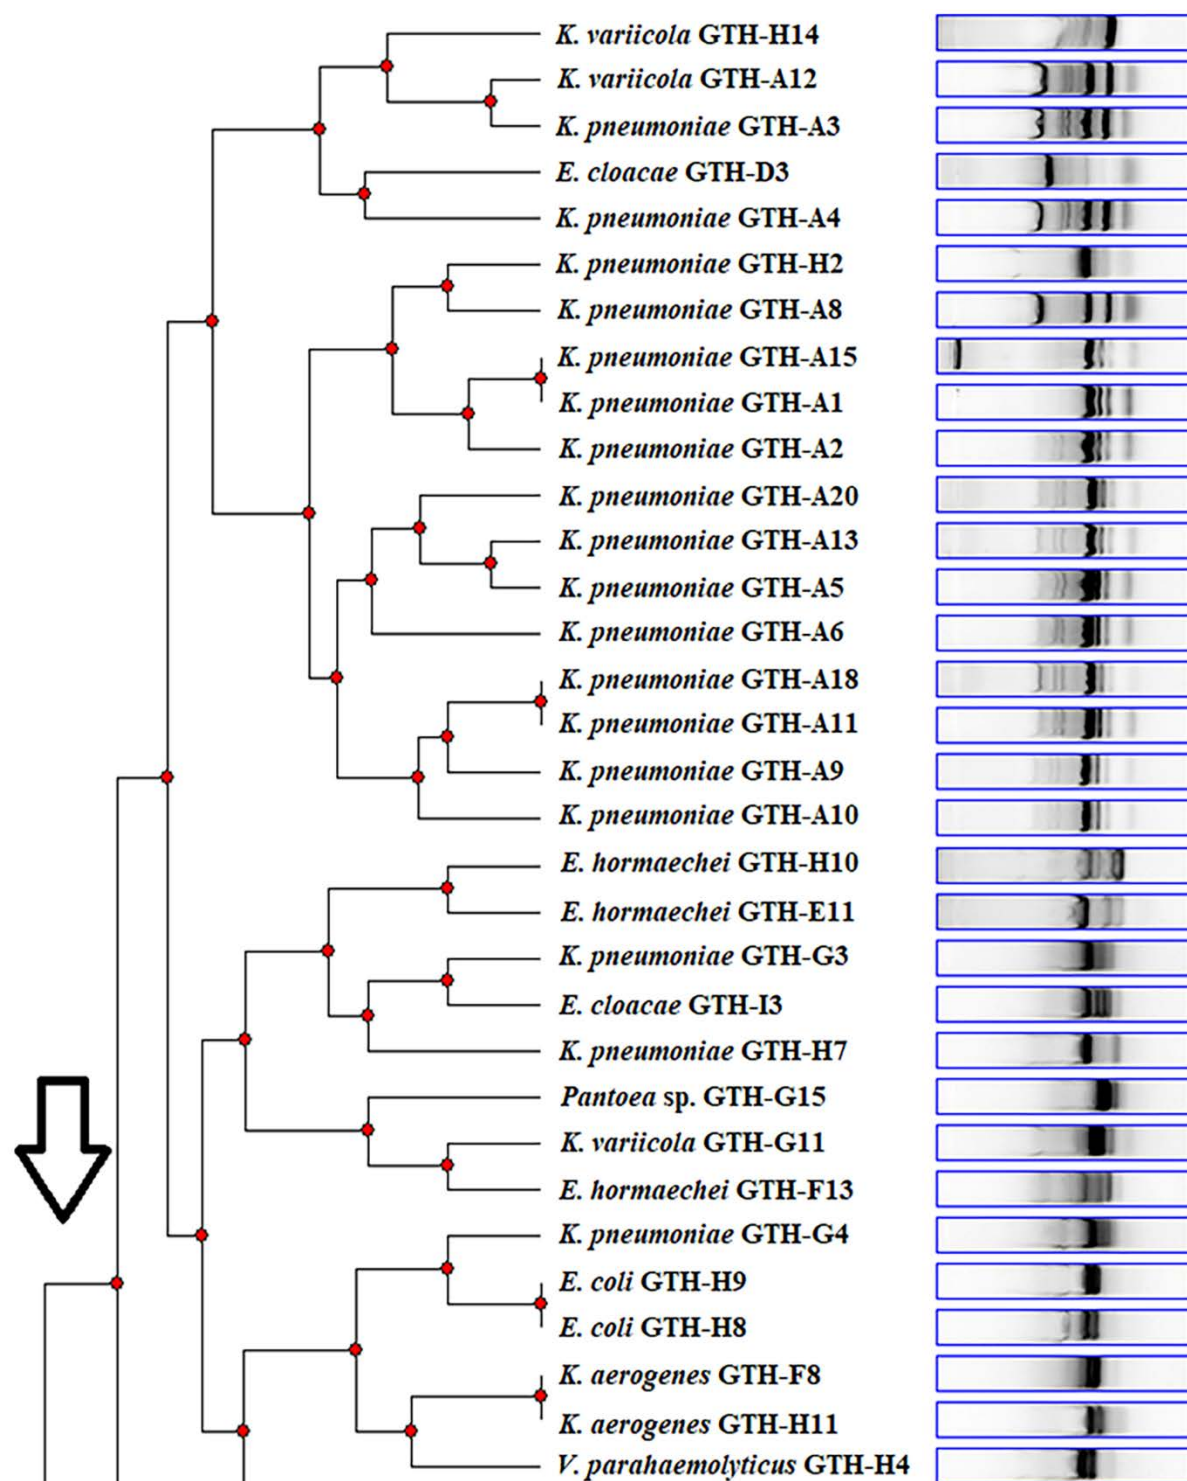

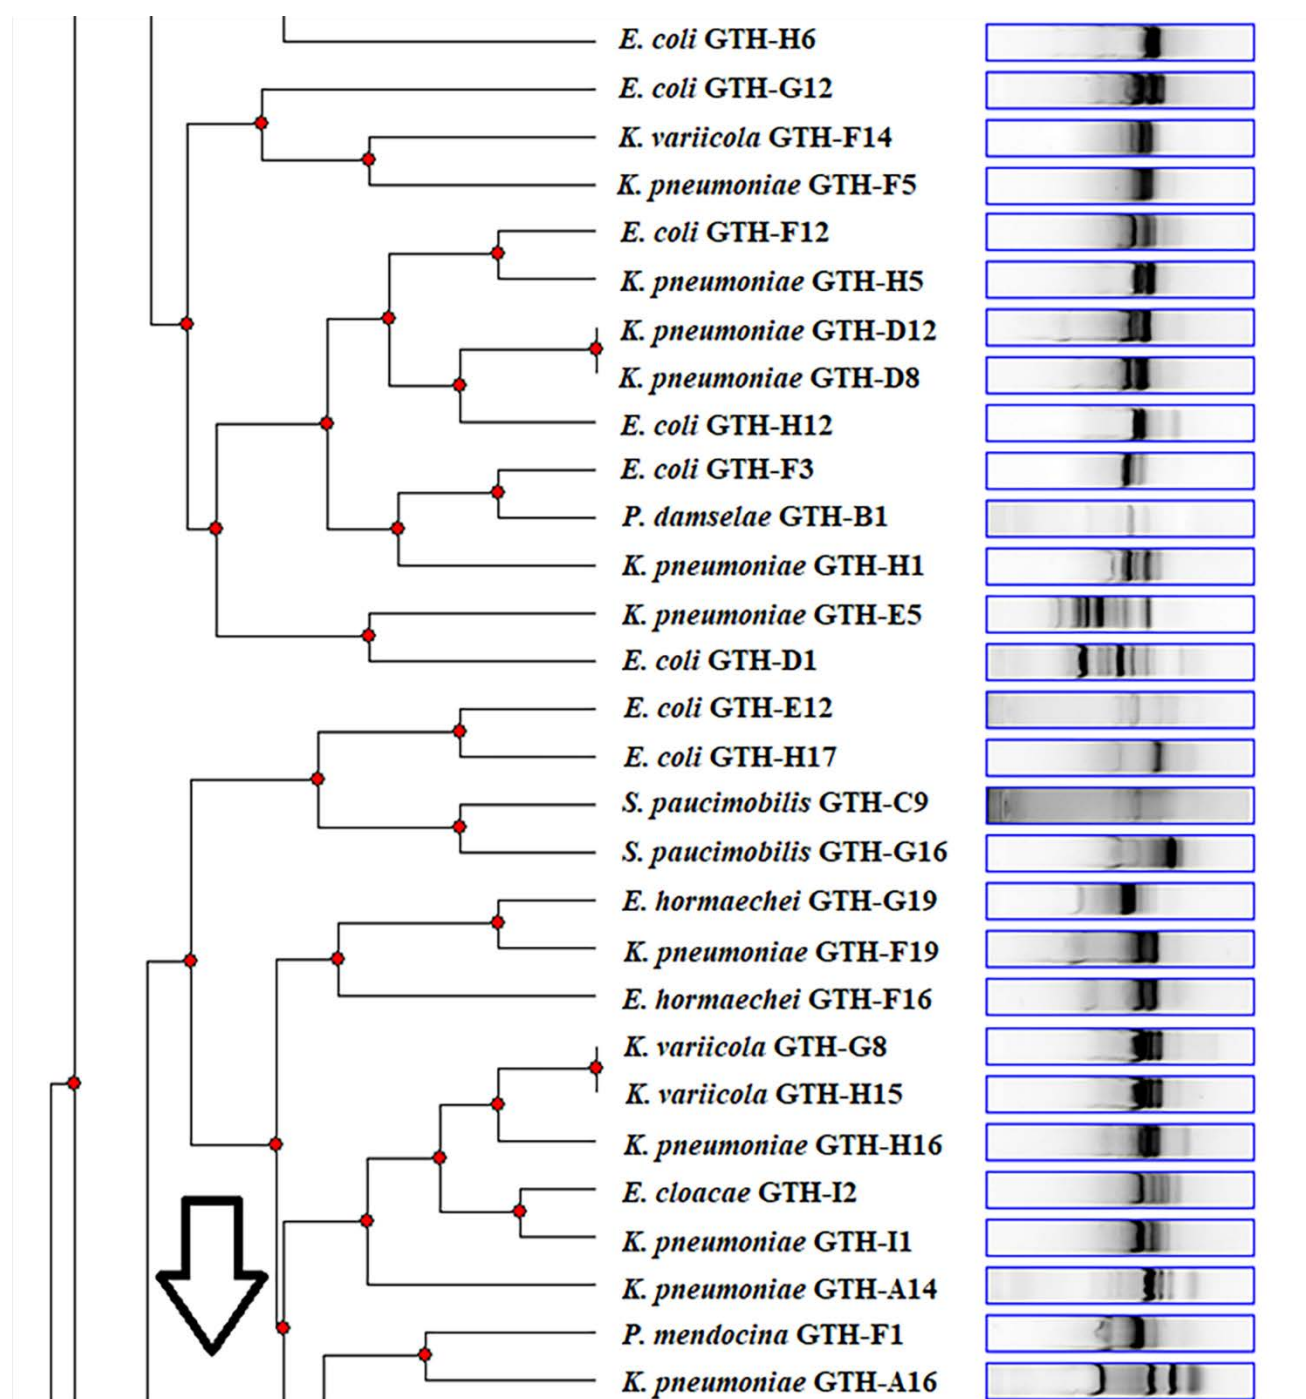

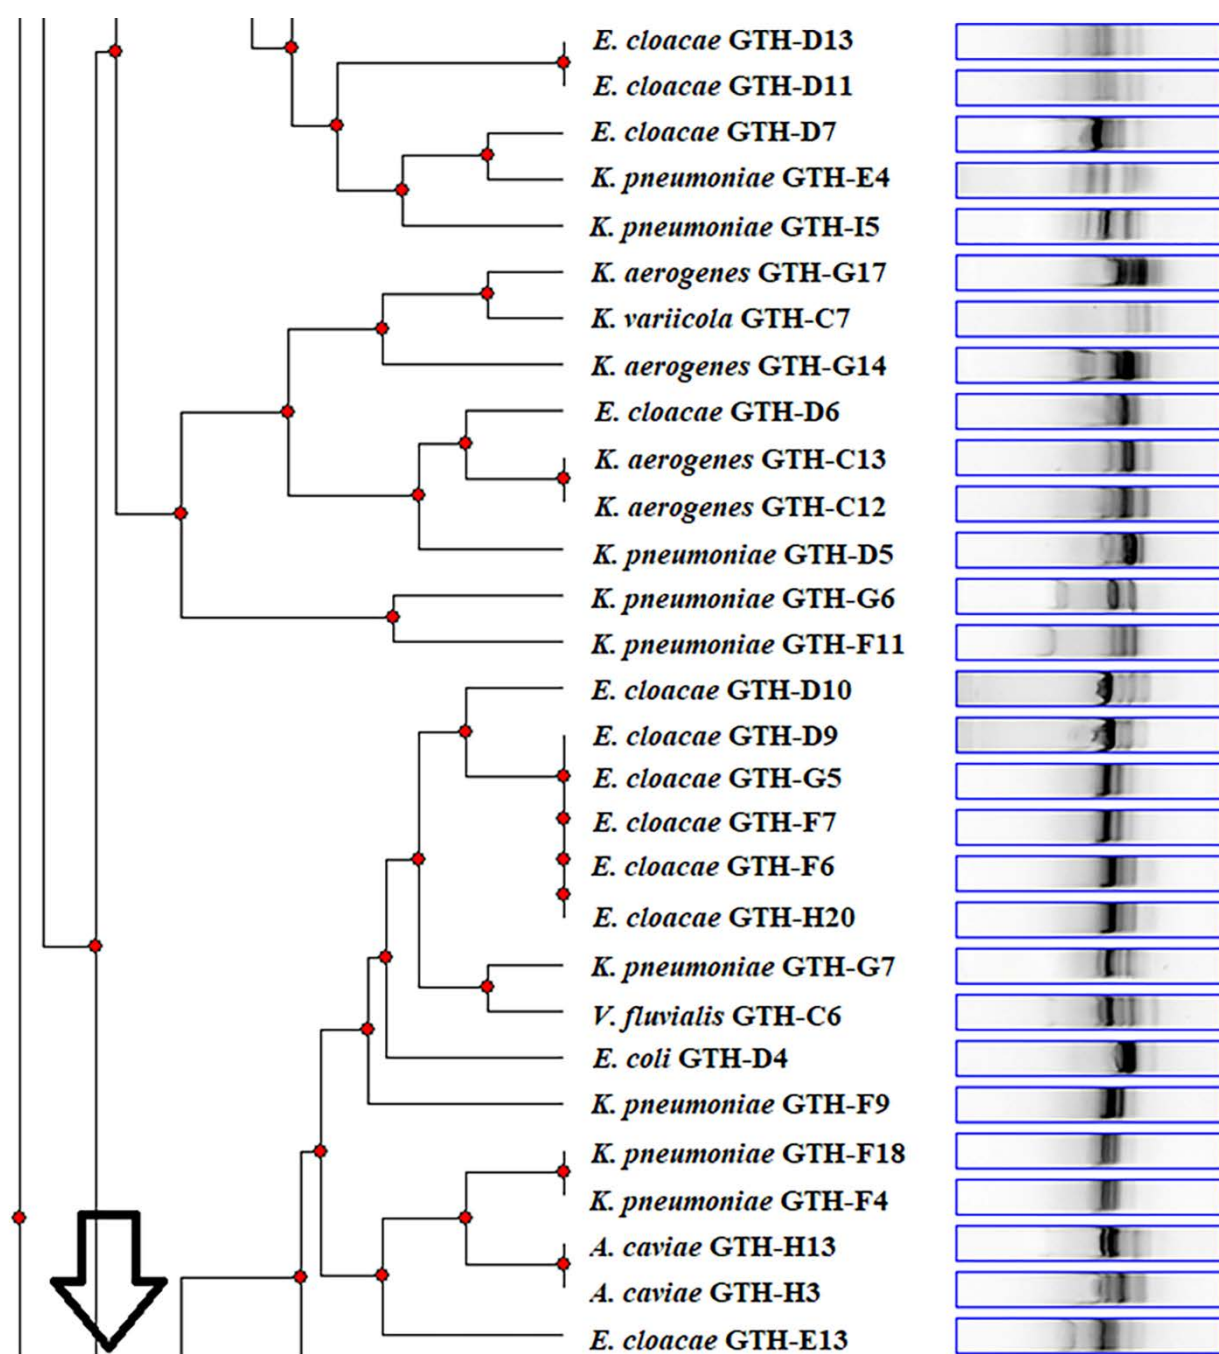

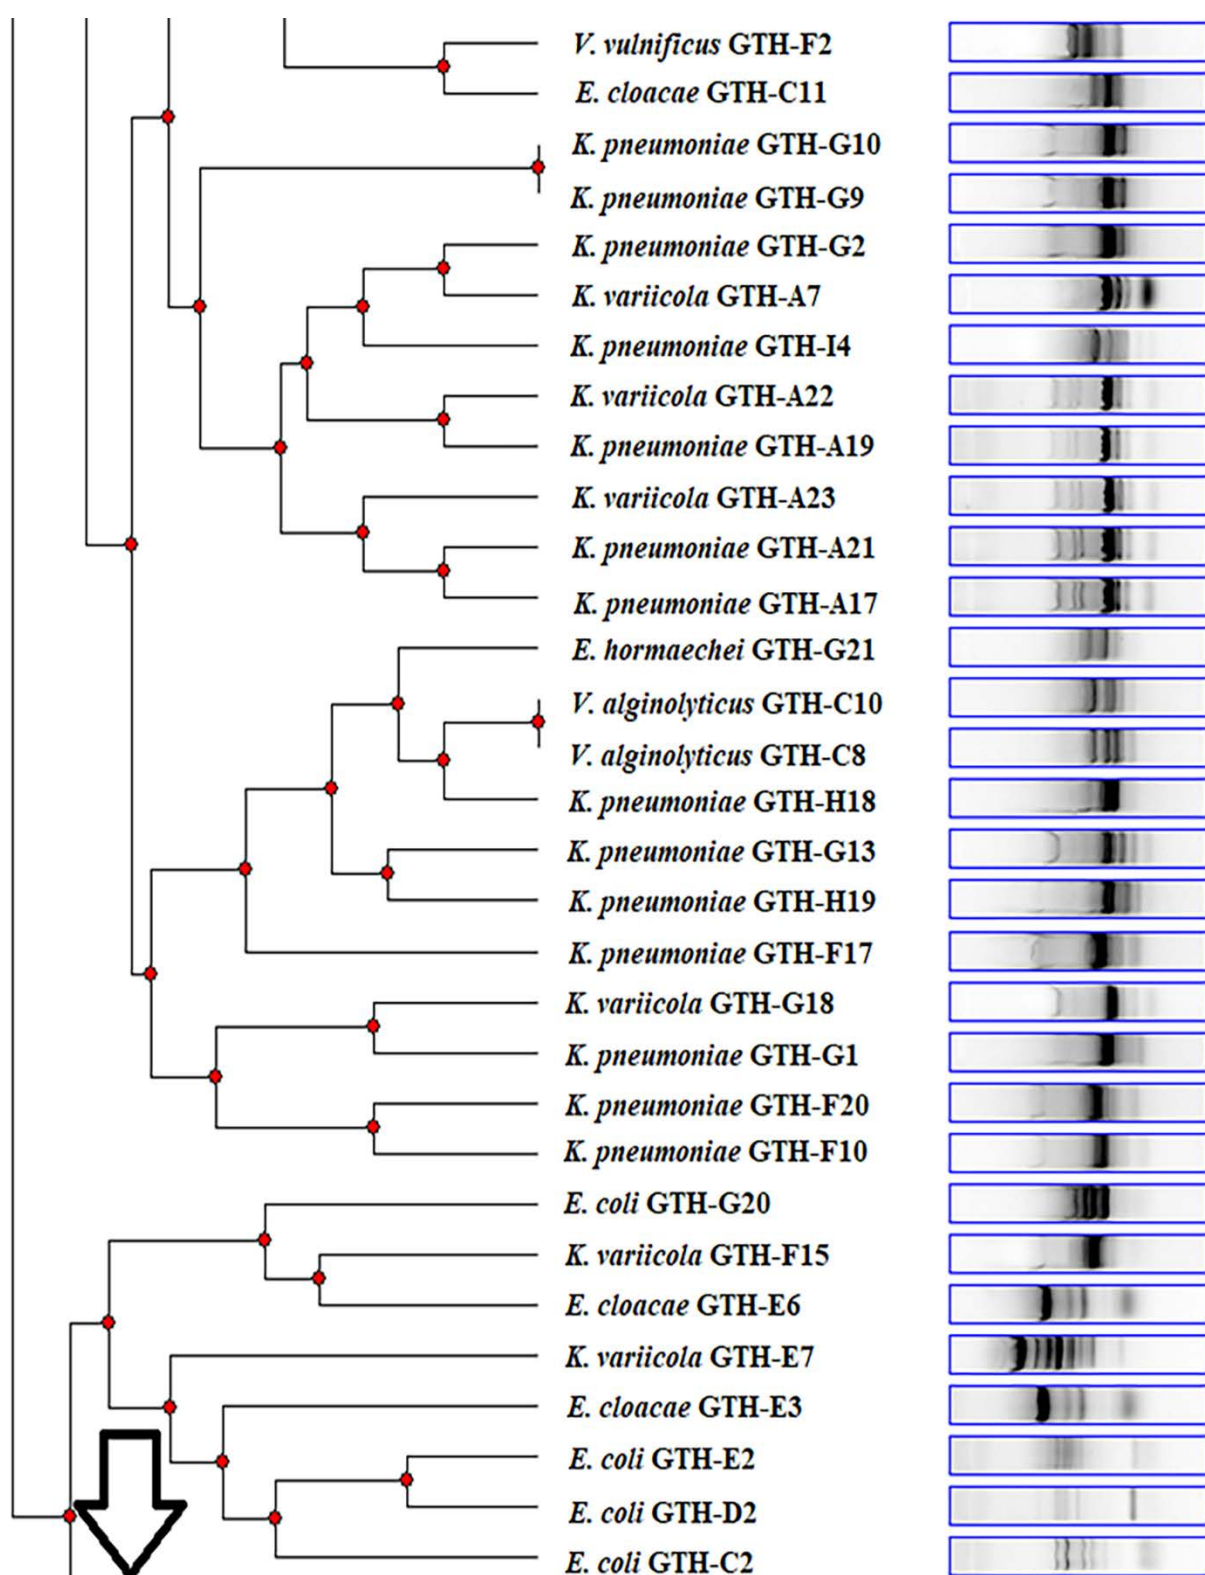



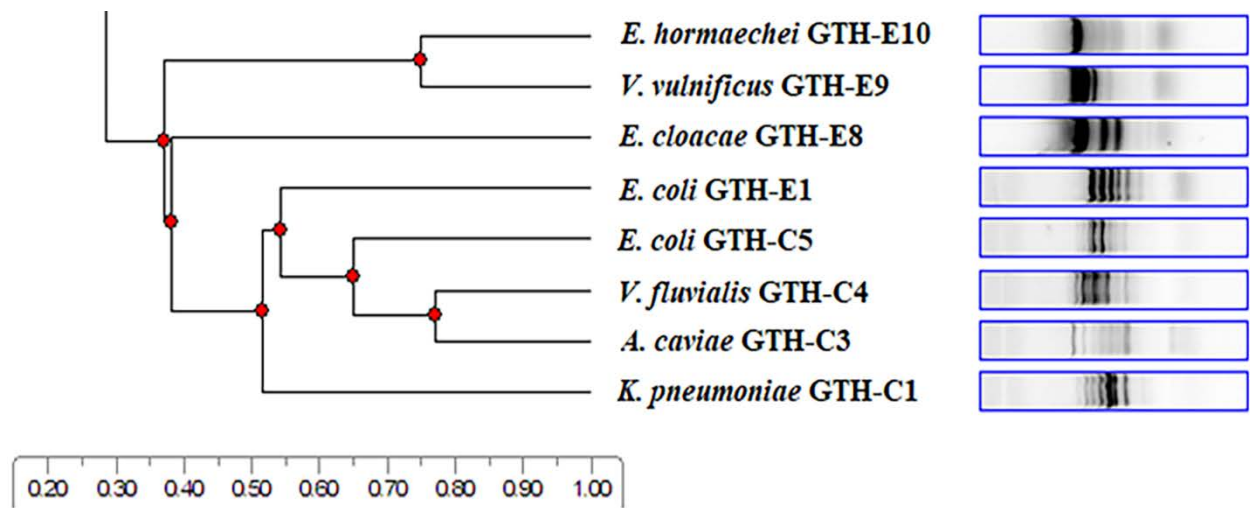

**Figure S1.** Dendrogram constructed from ERIC-PCR patterns of the 129 presumptive enterobacterial isolates.
