# Supplementary material for: Identification, Characterization, and Virulence Gene Expression of Marine Enterobacteria in the Upper Gulf of Thailand
Source: MDPI journal article supplement (doi:10.3390/microorganisms10030511), 2022-02-26
Supplement: s1 [file s1]

**Table S2.** Antibiotic resistance patterns of enterobacterial strains and numbers of strain(s) belonging to each pattern.

| Antibiotic resistance pattern   | Number of resistant strain(s) (%) | Antibiotic resistance pattern     | Number of resistant strain(s) (%) | Antibiotic resistance pattern              | Number of resistant strain(s) (%) |
|---------------------------------|-----------------------------------|-----------------------------------|-----------------------------------|--------------------------------------------|-----------------------------------|
| 1) none                         | 6 (5.9%)                          | 2) TI                             | 3 (3.0%)                          | 3) CX                                      | 6 (5.9%)                          |
| 4) CIP                          | 1 (1.0%)                          | 5) GEN                            | 1 (1.0%)                          | 6) TOB                                     | 2 (2.0%)                          |
| 7) AMP TI                       | 15 (14.9%)                        | 8) AMP CX                         | 9 (8.9%)                          | 9) CX NX                                   | 1 (1.0%)                          |
| 10) AMP TI CX                   | 1 (1.0%)                          | 11) AMP TI CIP                    | 6 (5.9%)                          | 12) AMP TI NX                              | 1 (1.0%)                          |
| 13) AMP CX CIP                  | 1 (1.0%)                          | 14) TI CIP NX                     | 1 (1.0%)                          | 15) AMP TI CX CIP                          | 1 (1.0%)                          |
| 16) AMP TI CX NX                | 1 (1.0%)                          | 17) AMP TI CX C                   | 1 (1.0%)                          | 18) AMP TI CPM CIP                         | 2 (2.0%)                          |
| 19) AMP TI CPM NX               | 1 (1.0%)                          | 20) AMP TI CIP NX                 | 13 (12.9%)                        | 21) AMP TI CIP AK                          | 1 (1.0%)                          |
| 22) AMP TI NX TOB               | 1 (1.0%)                          | 23) AMP TI NX C                   | 2 (2.0%)                          | 24) TI CIP NX TOB                          | 1 (1.0%)                          |
| 25) AMP TI CX CTR C             | 2 (2.0%)                          | 26) AMP TI CX CPM NX              | 1 (1.0%)                          | 27) AMP TI CPM CIP NX                      | 2 (2.0%)                          |
| 28) AMP TI CIP LE NX            | 1 (1.0%)                          | 29) AMP TI CIP NX TOB             | 1 (1.0%)                          | 30) TI CX CIP NX C                         | 1 (1.0%)                          |
| 31) AMP TI CX CPM CIP C         | 1 (1.0%)                          | 32) AMP TI CX CPM AK C            | 1 (1.0%)                          | 33) AMP TI CTR CIP NX C                    | 1 (1.0%)                          |
| 34) AMP TI MRP CIP LE NX        | 1 (1.0%)                          | 35) AMP TI CPM CIP NX TOB         | 1 (1.0%)                          | 36) AMP TI CIP NX GEN TOB                  | 1 (1.0%)                          |
| 37) AMP CX MRP CIP NX AK        | 1 (1.0%)                          | 38) AMP TI CIP LE NX TOB C        | 1 (1.0%)                          | 39) AMP TI CIP NX AK GEN TOB               | 1 (1.0%)                          |
| 40) AMP TI CIP NX AK TOB C      | 1 (1.0%)                          | 41) TI CX CPM MRP NX TOB C        | 1 (1.0%)                          | 42) AMP TI CX CIP LE NX TOB C              | 1 (1.0%)                          |
| 43) AMP TI CPM CIP NX GEN TOB C | 1 (1.0%)                          | 44) AMP TI CX CIP NX AK GEN TOB C | 1 (1.0%)                          | 45) AMP TI CX CTR CPM CIP LE NX AK GEN TOB | 1 (1.0%)                          |

AK: amikacin (30 µg); AMP: ampicillin (10 µg); C: Chloramphenicol (30 µg); CIP: ciprofloxacin (5 µg); CPM: cefepime (30 µg); CTR: ceftriaxone (30 µg); CX: ceftiofloxacin (30 µg); GEN: gentamicin (10 µg); LE: levofloxacin (5 µg); MRP: meropenem (10 µg); NX: norfloxacin (10 µg); TI: ticarcillin (75 µg); TOB: tobramycin (10 µg)
