# Supplementary material for: Identification, Characterization, and Virulence Gene Expression of Marine Enterobacteria in the Upper Gulf of Thailand
Source: MDPI journal article supplement (doi:10.3390/microorganisms10030511), 2022-02-26
Supplement: s1 [file s1]

**Table S1.** Nucleotide sequences of primers and sizes of the PCR products for the examined antibiotic resistance and virulence genes.

| Gene            | Nucleotide sequence of primer                                                                        | Size of the PCR product (bp) | Reference |
|-----------------|------------------------------------------------------------------------------------------------------|------------------------------|-----------|
| <i>ampC</i>     | AMPCf 5' ATT CGT ATG CTG GAT CTC GCC ACC 3'<br>AMPCr 5' CAT GAC CCA GTT CGC CAT ATC CTG 3'           | 395                          | [64]      |
| <i>blaCMY2</i>  | CMY2f 5' TGA TGC AGG AGC AGG CTA TTC CA 3'<br>CMY2r 5' CTA ACG TCA TCG GGG ATC TGC 3'                | 323                          | [65]      |
| <i>blaCTX-M</i> | CTXMf 5' ATG TGC AGY ACC AGT AAR GTK ATG GC 3'<br>CTXMr 5' TGG GTR AAR TAR GTS ACC AGA AYC AGC GG 3' | 593                          | [66]      |
| <i>blaKPC</i>   | KPCf 5' ATG TCA CTG TAT CGC CGT C 3'<br>KPCr 5' AAT CCC TCG AGC GCG AGT 3'                           | 863                          | [65]      |
| <i>blaNDM</i>   | NDMf 5' GGT GCA TGC CCG GTG AAA TC 3'<br>NDMr 5' ATG CTG GCC TTG GGG AAC G 3'                        | 660                          | [65]      |
| <i>blaSHV</i>   | SHVf 5' CTT TAT CGG CCC TCA CTC AA 3'<br>SHVr 5' AGG TGC TCA TCA TGG GAA AG 3'                       | 237                          | [66]      |
| <i>blaTEM</i>   | TEMf 5' CGC CGC ATA CAC TAT TCT CAG AAT GA 3'<br>TEMr 5' ACG CTC ACC GGC TCC AGA TTT AT 3'           | 445                          | [66]      |
| <i>blaVIM</i>   | VIMf 5' GTT TGG TCG CAT ATC GCA AC 3'<br>VIMr 5' AAT GCG CAG CAC CAG GAT AGA A 3'                    | 382                          | [65]      |
| <i>blaZ</i>     | BLAZf 5' TTA AAG TCT TAC CGA AAG CAG 3'<br>BLAZr 5' TAA GAG ATT TGC CTA TGC TT 3'                    | 377                          | [67]      |
| <i>mecA</i>     | MECAf 5' CCT AGT AAA GCT CCG GAA 3'<br>MECAr 5' CTA GTC CAT TCG GTC CA 3'                            | 314                          | [68]      |
| <i>cnf2</i>     | CNF2f 5' GTG AGG CTC AAC GAG ATT ATG CAC TG 3'                                                       | 839                          | [69]      |

|             |                                                                                                   |       |      |
|-------------|---------------------------------------------------------------------------------------------------|-------|------|
|             | CNF2r 5' CCA CGC TTC TTC TTC AGT TGT TCC TC 3'                                                    |       |      |
| <i>csgD</i> | CSGDf 5' TGA AAR YTG GCC GCA TAT CAA TG 3'<br>CSGDr 5' ACG CCT GAG GTT ATC GTT TGC C 3'           | 355   | [70] |
| <i>eaeA</i> | EAEAf 5' TGA GCG GCT GGC ATG AGT CAT AC 3'<br>EAEAr 5' TCG ATC CCC ATC GTC ACC AGA GG 3'          | 241   | [69] |
| <i>espB</i> | ESPBf 5' GCC GCT CTG ATT GGT GGT GCT 3'<br>ESPBr 5' TGG CGT TGA ACC GGA AAT CCT 3'                | 387   | [71] |
| <i>kfu</i>  | KFUf 5' GAA GTG ACG CTG TTT GTG GC 3'<br>KFUr 5' TTT CGT GTG GCC AGT GAC TC 3'                    | 797   | [72] |
| <i>LTI</i>  | LTI f 5' TGG ATT CAT CAT GCA CCA CAA GG 3'<br>LTI r 5' CCA TTT CTC TTT TGC CTG CCA TC 3'          | 360   | [69] |
| <i>magA</i> | MAGAf 5' GGT GCT CTT TAC ATC ATT GC 3'<br>MAGAr 5' GCA ATG GCC ATT TGC GTT AG 3'                  | 1,280 | [72] |
| <i>STII</i> | STII f 5' CCC CCT CTC TTT TGC ACT TCT TTC C 3'<br>STII r 5' TGC TCC AGC AGT ACC ATC TCT AAC CC 3' | 423   | [69] |
| <i>uge</i>  | UGEf 5' TCT TCA CGC CTT CCT TCA CT 3'<br>UGEr 5' GAT CAT CCG GTC TCC CTG TA 3'                    | 534   | [72] |
| <i>vt2e</i> | VT2Ef 5' CCA GAA TGT CAG ATA ACT GGC GAC 3'<br>VT2Er 5' GCT GAG CAC TTT GTA ACA ATG GCT G 3'      | 322   | [69] |

---
